# Supplementary material for: Minimal important change and other measurement properties of the Oxford Elbow Score and the Quick Disabilities of the Arm, Shoulder, and Hand in patients with a simple elbow dislocation; validation study alongside the multicenter FuncSiE trial
Source: PubMed Central journal article supplement (PMC5590744; doi:10.1371/journal.pone.0182557), 2017-09-08
Supplement: pone.0182557.s002.pdf [file pone.0182557.s002.pdf]

**S2 Table. Answers to the transition item at three different time windows in patients with a simple elbow dislocation**

| Transition item          | Total    | Time window         |               |                |
|--------------------------|----------|---------------------|---------------|----------------|
|                          |          | 6 weeks to 3 months | 3 to 6 months | 6 to 12 months |
| 1 'completely recovered' | 69 (29%) | 11 (16%)            | 24 (30%)      | 34 (38%)       |
| 2 'much better'          | 74 (31%) | 36 (51%)            | 25 (32%)      | 13 (14%)       |
| 3 'slightly better'      | 57 (24%) | 17 (24%)            | 19 (24%)      | 21 (23%)       |
| 4 'no change'            | 31 (13%) | 5 (7%)              | 9 (11%)       | 17 (19%)       |
| 5 'slightly worse'       | 9 (4%)   | 2 (3%)              | 2 (3%)        | 5 (6%)         |
| 6 'much worse'           | 0 (0%)   | 0 (0%)              | 0 (0%)        | 0 (0%)         |
| 7 'worse than ever'      | 0 (0%)   | 0 (0%)              | 0 (0%)        | 0 (0%)         |
| Missing data             | 60       | 29                  | 21            | 10             |

Data are shown as number with valid percentage.
